# Supplementary material
Source: Springer Nature journal article supplement (https://www.springermedizin.de/resource/supplementary/12943_2012_1199_MOESM1_ESM.pdf/9552378)
Supplement: MOESM1 [file 9552378]

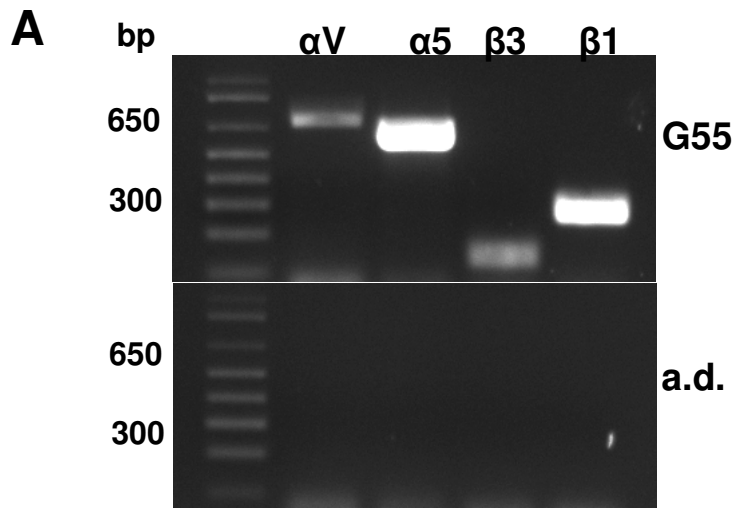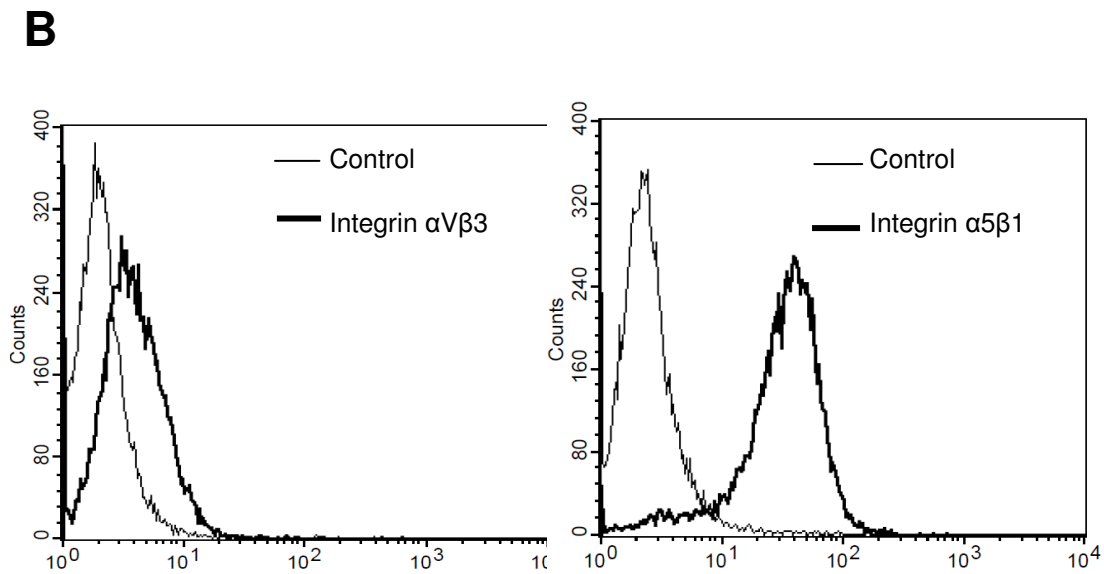

**Supplementary Figure 1S. Expression analyses of  $\alpha V \beta 3$  and  $\alpha 5 \beta 1$  integrins in G55 cells.** Endogenous expression of  $\alpha V \beta 3$  and  $\alpha 5 \beta 1$  integrins in G55 cells was detected at the mRNA level using RT-PCR (A) and at the protein level using Flow Cytometry Analyses (B).
